1

2 **Comparative Analysis of *UL16* Mutants Derived from Multiple Strains of**  
3 **HSV-2 and HSV-1 Reveals Species-Specific Requirements for the**  
4 **UL16 Protein**

5 Jie Gao, Xiaohu Yan and Bruce W. Banfield\*

Department of Biomedical and Molecular Sciences, Queen's University, Kingston, Ontario,  
Canada K7L 3N6.

**Word count abstract:** 240

**Word count importance:** 133

**Running title:** Species-specific requirements for HSV UL16

**Keywords:** Herpes simplex virus, tegument, UL16, nuclear egress, secondary envelopment

**\*Corresponding Author:** Bruce W. Banfield, Ph.D.

Department of Biomedical & Molecular Sciences

Queen's University

Kingston, Ontario

Canada, K7L 3N6

(613) 533-2459

Email: [bruce.banfield@queensu.ca](mailto:bruce.banfield@queensu.ca)

## Abstract

6           Orthologs of the herpes simplex virus (HSV) *UL16* gene are conserved throughout the  
7 *Herpesviridae*. Because of this conservation, one might expect that these proteins perform  
8 similar functions for all herpesviruses. Previous studies on a *UL16* null mutant derived from  
9 HSV-2 strain 186 revealed a roughly 100-fold replication defect and a critical role for UL16 in  
10 the nuclear egress of capsids. These findings were in stark contrast to what has been  
11 observed with *UL16* mutants of HSV-1 and pseudorabies virus where roughly 10-fold  
12 replication deficiencies were reported that were accompanied by defects in the secondary  
13 envelopment of cytoplasmic capsids. One possible explanation for this discrepancy is that the  
14 HSV-2 186 strain is not representative of the HSV-2 species. To address this possibility,  
15 multiple *UL16* null mutants were constructed in multiple HSV-2 and HSV-1 strains by  
16 CRISPR/Cas9 mutagenesis and their phenotypes characterized side-by-side. This analysis  
17 showed that all the HSV-2 *UL16* mutants had 50 to 100-fold replication deficiencies that were  
18 accompanied by defects in the nuclear egress of capsids as well as defects in the secondary  
19 envelopment of cytoplasmic capsids. By contrast, most HSV-1 *UL16* mutants had 10-fold  
20 replication deficiencies that were accompanied by defects in secondary envelopment of  
21 cytoplasmic capsids. These findings indicated that UL16 has HSV species-specific functions.  
22 Interestingly, HSV-1 UL16 could promote the nuclear egress of HSV-2 *UL16* null strains,  
23 suggesting that, unlike HSV-1, HSV-2 lacks an activity that can compensate for nuclear  
24 egress in the absence of UL16.

25

26

27

## 28 **Importance**

29           HSV-2 and HSV-1 are important human pathogens that cause distinct diseases in their  
30 hosts. A complete understanding of the morphogenesis of these viruses is expected to reveal  
31 vulnerabilities that can be exploited in the treatment of HSV disease. UL16 is a virion  
32 structural component that is conserved throughout the *Herpesviridae* and functions in virus  
33 morphogenesis, however, previous studies have suggested different roles for UL16 in the  
34 morphogenesis of HSV-2 and HSV-1. This study sought to resolve this apparent discrepancy  
35 by analyzing multiple UL16 mutant viruses derived from multiple strains of HSV-2 and HSV-1.  
36 The data indicate that UL16 has HSV species-specific functions insofar as HSV-2 has a  
37 requirement for UL16 in the escape of capsids from the nucleus whereas both HSV-2 and  
38 HSV-1 require UL16 for final envelopment of capsids at cytoplasmic membranes.

39

## 40 **Introduction**

41           While the early stages of herpesvirus assembly take place in the nucleus, the final  
42 stages of virion assembly occur in the cytoplasm of infected cells. Viral DNA is packaged into  
43 preformed procapsids in the infected cell nucleus resulting the formation of C-capsids that are  
44 competent for subsequent stages in virion maturation. To reach the cytoplasm, genome  
45 containing C-capsids must transit across the inner and outer nuclear membranes utilizing a  
46 process referred to as nuclear egress - a subject of recent and intense investigation by  
47 numerous laboratories (1, 2). Nuclear egress of C-capsids occurs through primary  
48 envelopment of capsids at the inner nuclear membrane followed by de-envelopment, and  
49 release of capsids into the cytoplasm, through fusion of the perinuclear virion envelope with

50 the outer nuclear membrane. Once in the cytoplasm, the C-capsid acquires its final envelope  
51 by budding into membrane vesicles derived from the trans-Golgi network, or an endocytic  
52 compartment, in a process referred to as secondary envelopment (3-5). Finally, enveloped  
53 virions contained within vesicles are transported to the cell surface where they fuse with the  
54 plasma membrane releasing the mature virion into the extracellular space.

55 This study concerns the functions of the HSV UL16 protein in virion assembly.  
56 Orthologs of the HSV UL16 protein are conserved throughout the *Herpesviridae*, however its  
57 specific roles in the virus replicative cycle are poorly understood. Contributing to this lack of  
58 clarity are seemingly conflicting reports on the functions of the HSV-2 and HSV-1 UL16  
59 orthologs. This laboratory recently reported that deletion of *UL16* from the HSV-2 186 strain  
60 resulted in a roughly 100-fold reduction in virus replication and a failure of C-capsids to  
61 undergo efficient nuclear egress (6). In contrast to these findings, several groups have  
62 reported that HSV-1 *UL16* mutants have more modest, roughly 10-fold, replication  
63 deficiencies and are defective in secondary envelopment rather than nuclear egress (7, 8). It  
64 is noteworthy that studies on the UL16 ortholog from pseudorabies virus (PRV), a virus  
65 distantly related to HSV, closely resembled the findings seen with HSV-1, where roughly 10-  
66 fold replication deficiencies associated with defective secondary envelopment were reported  
67 (9). What could explain these conflicting reports? One possibility was that the single strain of  
68 HSV-2 studied by Gao and colleagues (6), strain 186, was an outlier and the results obtained  
69 with this strain were not representative of the HSV-2 species as a whole. Another possibility  
70 was that the HSV-1 and PRV strains analyzed previously were constructed in such a way that  
71 promoted the selection of suppressor mutations that might overcome the replication  
72 deficiencies and nuclear egress phenotypes exhibited by HSV-2 (186)  $\Delta 16$ , which, by



73 contrast, was isolated on complementing cells to mitigate the selection of suppressor  
74 mutations. A third possibility was that UL16 has species-specific functions during the  
75 replication of HSV-2 and HSV-1.

76 The goal of this study was to resolve this controversy by performing a side-by-side  
77 analysis of a panel of newly constructed *UL16* mutants derived from multiple strains of HSV-2  
78 and HSV-1. All strains were constructed using the same procedures. CRISPR/Cas9 based  
79 mutagenesis was used to create the mutant virus genomes and all *UL16* mutant viruses were  
80 propagated on UL16-expressing cells to avoid the enrichment of suppressor mutants during  
81 strain isolation. To extend the previous analysis of HSV-2 strain 186 we chose build *UL16*  
82 mutants into strains HG52 and SD90e. Strain HG52 is a well-studied HSV-2 reference strain  
83 that was the first to be completely sequenced (10), whereas strain SD90e is a low passage  
84 clinical isolate that has been proposed to serve as a new HSV-2 reference strain (11, 12). For  
85 the construction of new HSV-1 *UL16* mutants, we chose to utilize strains F and KOS, two  
86 well-studied laboratory strains that have been used by others to study the function of UL16 (7,  
87 8). Our analysis indicates that UL16 plays a critical role in both the nuclear egress and  
88 secondary envelopment of HSV-2 strains whereas HSV-1 UL16 functions primarily in the  
89 secondary envelopment of cytoplasmic capsids. Interestingly, trans-complementation  
90 experiments revealed that HSV-2 and HSV-1 UL16 can substitute for each other suggesting  
91 that the genetic basis for the species-specific requirements of *UL16* reside outside the *UL16*  
92 locus.

93

94

95 **Results**

96 **Construction of HSV *UL16* mutant viruses.** We constructed *UL16* deletions in multiple  
97 HSV-2 and HSV-1 strains to enable a comparative analysis of these viruses. To avoid any  
98 selective pressure during the isolation of these strains *UL16* expressing cell lines were used.  
99 *UL16* deletions were constructed in HSV-2 strains SD90e and HG52, and HSV-1 strains KOS  
100 and F by CRISPR/Cas9-based mutagenesis as described in Materials and Methods. Two  
101 mutants derived independently from each strain were selected for further study and all  
102 mutants studied were used at low passage. DNA sequencing of HSV-2 and HSV-1 deletion  
103 mutants revealed the exact nature of the *UL16* mutants isolated (Fig. 1A and 1B). To verify  
104 that the *UL16* mutants did not express *UL16*, Vero cells were infected with the different HSV-  
105 2 and HSV-1 *UL16* mutants at MOI of 0.5 and cells lysates prepared at 24 hpi. Western blots  
106 of cell lysates were probed for HSV-2 and HSV-1 *UL16*, the immediate early protein ICP27  
107 (infection control) and  $\beta$ -actin (loading control) (Fig. 1C and 1D). Full-length *UL16* was  
108 observed in all wild type virus infected cell lysates, while no full-length *UL16* protein was  
109 expressed in lysates from any *UL16* mutant infected cells. Notably, *UL16S* $\Delta$ 10-59 and  
110 *UL16K* $\Delta$ 6-139 infected cell lysates, contained truncated *UL16* proteins identified by asterisks  
111 in Figs. 1C and D. These data confirmed that all *UL16* mutants failed to produce full length  
112 *UL16* protein.

113

114 ***UL16* is required for efficient cell-to-cell spread of both HSV-2 and HSV-1 strains.** To  
115 determine if the cell-to-cell spread properties of these new *UL16* deletion mutants were  
116 consistent with our results with HSV-2 strain 186 (6) and those reported by others for HSV-1

117 strains KOS and F (8), monolayers of L, L16 (express HSV-2 UL16), L16K (express HSV-1  
118 UL16) or Vero cells were infected with *UL16* mutants and their parental viruses (Fig. 2). At 72  
119 hpi, cells were fixed and stained with methylene blue. All HSV-2 *UL16* null mutants formed  
120 visible plaques on complementing L16 cells, but did not form visible plaques on non-  
121 complementing L cells (Fig. 2A). Similarly, all HSV-1 *UL16* mutants formed visible plaques on  
122 complementing L16K cells, but not on L cells (Fig. 2C). Importantly, all *UL16* null strains  
123 formed visible plaques on non-complementing Vero cells, albeit much smaller than those  
124 formed in comparison to their parental strains (Fig. 2A and 2C), indicating some capacity for  
125 spread between Vero cells that was not seen on L cell monolayers. These data suggested  
126 that HSV-1 and HSV-2 *UL16* mutants have similar deficiencies in cell-to-cell spread.

127 To quantify the abilities of *UL16* deletion viruses to spread, we measured the area of  
128 the plaques produced by the *UL16* deletion mutants on non-complementing Vero cells. At 24  
129 hpi plaques were fixed and stained using antisera against HSV Us3 and the areas of the  
130 plaques measured using ImagePro 6.3. The two HSV-2 (SD90e) *UL16* mutants formed  
131 plaques approximately 13% of the size of their parental strain, while HSV-2 (HG52) *UL16*  
132 mutant plaques were around 8% the size of WT HG52 plaques (Fig. 2B). In addition, the  
133 plaque size of our original HSV-2 186 strain *UL16* null mutant,  $\Delta$ 16, was 14% that of WT 186  
134 strain (Fig. 2B). Surprisingly, all HSV-1 *UL16* null mutants formed plaques roughly 95%  
135 smaller than their parental strains, similar to what was observed with HSV-2 *UL16* null strains  
136 (Fig. 2D). Collectively, these findings suggested that UL16 is critical for virus spread on non-  
137 complementing cells and no obvious differences between HSV-2 and HSV-1 virus spread  
138 were observed in the absence of UL16.

139 **Replication kinetics of HSV-2 and HSV-1 *UL16* null strains.** To provide a more  
140 comprehensive view of the replication defects of HSV-2 and HSV-1 *UL16* deletion mutants,  
141 we performed multi-step growth analysis. Monolayers of Vero cells were infected with HSV-2  
142 and HSV-1 *UL16* mutants and their corresponding parental strains at an MOI of 0.01. Cells  
143 and medium were harvested together at indicated time points after infection and titrated on  
144 monolayers of complementing L16 cells. The results showed that the HSV-2 (SD90e and  
145 HG52) *UL16* deletions had approximately 100-fold and 50-fold reductions in end-point titres  
146 compared their parental strains, respectively (Fig. 3). By contrast, with one exception, our  
147 KOS and F *UL16* mutants had roughly 10-fold reductions in virus replication compared to their  
148 parental strain (Fig. 3). UL16FFS27/3 was an outlier insofar as it replicated much more poorly  
149 (400-fold lower than WT F) than the other HSV-1 strains analyzed. With the exception of the  
150 UL16FFS27/3 strain, these data are consistent with previous findings (6-8) indicating that  
151 HSV-2 *UL16* mutants replicate less efficiently than HSV-1 *UL16* mutants.

152

153 **Reciprocal complementation between HSV-2 and HSV-1 *UL16*.** To examine whether  
154 HSV-2 and HSV-1 *UL16* proteins could functionally compensate for each other, reciprocal  
155 complementation assays were performed. Monolayers of Vero, Vero16 (expressing HSV-2  
156 *UL16*) and Vero16K (expressing HSV-1 *UL16*) were infected with the same dilutions of HSV-2  
157 and HSV-1 *UL16* deletion viruses and their parental strains. At 72 hpi cells were fixed and  
158 stained with methylene blue. Interestingly, all HSV-2 and HSV-1 *UL16* mutants formed  
159 plaques on Vero, Vero16 and Vero16K (Fig. 4). Notably, *UL16* mutants formed very small  
160 plaques on Vero cells compared to their parental strains, consistent with the data shown

161 above (Fig. 2). The data indicate that the HSV-2 UL16 protein can complement HSV-1 *UL16*  
162 null strains (Fig. 4A) and vice versa (Fig. 4B).

163

164 **Species specific requirements for the UL16 protein.** To define and compare the stages at  
165 which our HSV-2 and HSV-1 *UL16* mutants were blocked in their maturation, transmission  
166 electron microscopy (TEM) was performed. Vero cells were infected with HSV-1 and HSV-2  
167 *UL16* mutants and corresponding parental strains, and cells were fixed and processed for  
168 TEM at 16 hpi as described in Materials and Methods. A, B and C-capsids were readily  
169 observed in the nuclei of parental HSV-2 (SD90e) infected cells (Fig. 5A), and UL16S $\Delta$ 10-360  
170 infected cells (Fig.5C). However, similar to what we reported previously for HSV-2 (186) (6),  
171 many more cytoplasmic capsids were observed in HSV-2 (SD90e) infected cells (Fig.5B) than  
172 in cells infected with its corresponding *UL16* mutant, UL16S $\Delta$ 10-360 (Fig.5D). Numerous  
173 capsids were observed both in the nuclei and cytoplasm of HSV-1 (F) and UL16F $\Delta$ 139-359  
174 infected cells (Fig. 6). However, fewer enveloped cytoplasmic capsids were observed in cells  
175 infected with the *UL16* mutant, UL16F $\Delta$ 139-359 (Fig. 6D), compared to HSV-1 (F) infected  
176 cells (Fig. 6B). These findings are consistent with previous reports indicating that HSV-1 UL16  
177 functions in secondary envelopment (8).

178 To quantify the distribution of capsids in the presence and absence of UL16, viral  
179 particles at various stages of maturation were classified and counted in ten independent  
180 images of Vero cells infected with the strains listed in Table 2 and the ratios of intranuclear C-  
181 capsids:cytoplasmic capsids and enveloped:cytoplasmic capsids were analyzed in more  
182 detail (Fig. 7). We chose to focus on intranuclear C-capsids, instead of A, B and C-capsids

183 together, because C-capsids are preferentially selected for primary envelopment(13). The  
184 ratio of intranuclear C-capsids:cytoplasmic capsids was significantly greater in cells infected  
185 with HSV-2 *UL16* mutants than in cells infected with their parental counterparts (Fig. 7A). By  
186 contrast, the ratio of intranuclear C-capsids:cytoplasmic capsids was greater for parental  
187 HSV-1 strains than for their *UL16* mutants suggesting that HSV-1 *UL16* does not play a  
188 discernable role in nuclear egress. The fact that the ratios of intranuclear C-  
189 capsids:cytoplasmic capsids were significantly lower for HSV-1 *UL16* mutants compared to  
190 their parental strains may be due to the accumulation of cytoplasmic capsids in cells infected  
191 with the *UL16* mutant strains (Table 2 and Fig.6D). The mean ratios of enveloped/cytoplasmic  
192 capsids for HSV-2 and HSV-1 *UL16* mutant strains were significantly lower than their parental  
193 strains indicating that *UL16* functions in secondary envelopment for both species of HSV (Fig.  
194 7B). Taken together these data indicate that *UL16* has species-specific functions in HSV  
195 infection such that HSV-2 relies strongly on *UL16* for nuclear egress whereas both HSV-2 and  
196 HSV-1 rely on *UL16* for efficient secondary envelopment.

197         Because HSV-1 did not appear to require *UL16* for nuclear egress we were interested  
198 in determining if the HSV-1 *UL16* protein had the capacity to promote the nuclear egress of  
199 an HSV-2 *UL16* mutant. To test this, Vero16 and Vero16K cells were infected with  
200 *UL16S $\Delta$ 10-360* and *UL16K $\Delta$ 28-359*, processed for TEM (Fig. 8) and the TEM data quantified  
201 (Fig. 9). Both Vero16 and Vero16K cells were able to support the nuclear egress of  
202 *UL16S $\Delta$ 10-360* as evidenced by the appearance of numerous cytoplasmic capsids (Fig.8A,  
203 B). Quantification of these data indicated that HSV-2 and HSV-1 *UL16* were indistinguishable  
204 in their ability to complement the *UL16S $\Delta$ 10-360* nuclear egress defect (Figure 9A).  
205 Expression of HSV-1 *UL16*, but not HSV-2 *UL16*, modestly, but significantly, promoted the

206 nuclear egress of the UL16K $\Delta$ 28-359 strain (Figure 9A). As expected, both HSV-2 and HSV-1  
207 UL16 proteins were able to complement secondary envelopment of both HSV species (Fig.  
208 9B). Collectively, these data suggest that HSV-1 encodes a function, missing in HSV-2, that  
209 can compensate for nuclear egress in the absence of UL16.

210

## 211 **Discussion**

212 Here we describe the analysis of *UL16* deletion mutants derived from four HSV strains.  
213 The strategy used to construct these strains utilized CRISPR/Cas9 mutagenesis which was  
214 both efficient and rapid. Our approach utilized two gRNAs towards the *UL16* locus  
215 simultaneously. Cleavage of the *UL16* gene at the sites directed by the gRNAs and  
216 subsequent repair of the lesion by non-homologous end joining (NHEJ) resulted in the  
217 isolation of a variety of mutants; some having in-frame deletions and others with frame-shifts  
218 after the 5' gRNA directed cleavage. For the analysis presented here we chose to select a  
219 variety of *UL16* mutants for further study. It is noteworthy that all HSV-2 *UL16* mutants  
220 isolated displayed a similar phenotype. In the case of HSV-1, however, one of the F *UL16*  
221 mutants, UL16FFS27/3, was an outlier insofar as its replication was reduced much more  
222 severely than other HSV-1 *UL16* mutants (Fig. 3D). It is not clear why UL16FFS27/3 grows as  
223 poorly as it does, however, it is noteworthy that it forms smaller plaques on complementing  
224 cells than the other HSV-1 *UL16* mutants (Fig.4B) raising the possibility that additional  
225 mutations outside the *UL16* locus were introduced during its isolation. Alternatively, the N-  
226 terminal fragment of *UL16*, predicted to be produced by UL16FFS27/3, might act as a  
227 dominant negative protein resulting in the inhibition of both cell-to-cell spread and virus  
228 replication. Clearly, more work is required to determine the cause of the UL16FFS27/3 cell-to-

229 cell spread and replication phenotypes. Because of these caveats we eliminated this strain  
230 from subsequent ultrastructural analyses.

231 Our kinetic analysis of *UL16* mutant replication revealed that HSV-2 *UL16* mutants had  
232 roughly 50 to 100-fold reductions in virus replication while HSV-1 *UL16* mutants, with the  
233 exception of UL16FFS27/3 (see above), had approximately 10-fold reductions (Fig. 3). These  
234 results are consistent with previous findings suggesting HSV-2 and HSV-1 have differential  
235 requirements for *UL16* (6-8). Despite replicating better than HSV-2 *UL16* deletion mutants  
236 (Fig. 3), HSV-1 *UL16* mutants consistently formed slightly smaller plaques relative to their  
237 parental strains than the HSV-2 *UL16* mutants (Fig. 2). These findings may suggest that HSV-  
238 1 has a greater reliance on *UL16* for cell-to-cell spread of infection than does HSV-2. Along  
239 these lines, Wills and colleagues have documented an interaction between the N-terminus of  
240 HSV-1 *UL16* and the cytoplasmic tail of glycoprotein gE (14) and that a complex formed by  
241 *UL16*, *UL11* and *UL21* on the gE cytoplasmic tail is important for normal glycosylation of gE,  
242 trafficking of gE to the cell surface and cell-to-cell spread of infection (14, 15). The existence  
243 of such interactions and their potential roles in the spread of HSV-2 infection have yet to be  
244 determined. Perhaps such interactions are not required for efficient cell-to-cell spread in HSV-  
245 2 infected cells and therefore might explain the differences in relative plaque sizes observed.  
246 In support of this idea, it is noteworthy that the N-terminus of *UL16* is less conserved between  
247 HSV-2 and HSV-1 than the remainder of the protein (16) and our preliminary investigations  
248 suggest that gE glycosylation is unperturbed in cells infected with HSV-2  $\Delta 16$  (data not  
249 shown).

250 Our trans-complementation plaque assays revealed that HSV-1 *UL16* can rescue  
251 plaque formation of HSV-2 *UL16* mutants and vice versa (Fig. 4). Furthermore, TEM analysis



252 revealed that HSV-1 UL16 can promote the nuclear egress of HSV-2, despite not being  
253 required for HSV-1 nuclear egress (Fig. 8 and 9A). Our findings also indicate that both HSV-2  
254 and HSV-1 UL16 function in secondary envelopment and that these proteins are trans-  
255 complementary for this process (Fig.8 and 9B). Perhaps there are similarities in the  
256 processes of primary and secondary envelopment and HSV-1 UL16 is able to function in  
257 primary envelopment in the context of HSV-2 infection. The observation that HSV-1 and HSV-  
258 2 UL16 molecules can complement each other suggests that the genetic basis for the  
259 species-specific activities of UL16 lie outside the *UL16* locus.

260           Importantly, these findings do not fully explain the reductions in virus replication  
261 observed for all *UL16* mutant strains. The explanation for the magnitude of the replication  
262 deficiencies observed for *UL16* mutants are certainly multifactorial. The functions of HSV-1  
263 UL16 in cell-to-cell spread of infection have been well documented (14, 15). Additionally,  
264 previous studies on HSV-2 UL16 have implied a role for UL16 in viral DNA packaging into  
265 capsids (16). Moreover, the proportion of perinuclear virions compared to parental strains was  
266 reduced in all *UL16* mutants examined (Table 2). Taken together, these findings suggest that  
267 UL16 influences multiple stages of virion morphogenesis.

268           The goal of this study was to resolve an apparent discrepancy between the functions of  
269 HSV-2 and HSV-1 UL16 during virus maturation. We have conclusively demonstrated that  
270 UL16 is important for HSV-2 nuclear egress in multiple strains (186, SD90e and HG52).  
271 Additionally, it is clear that multiple strains of HSV-2 and HSV-1 rely on UL16 for efficient  
272 secondary envelopment. Despite important differences in primary and secondary  
273 envelopment, such as the well-characterized functions of the nuclear egress complex in

274 primary envelopment, these findings raise the intriguing possibility that some aspects of  
275 primary and secondary envelopment may be more similar than previously appreciated.

276

## 277 **Materials and Methods**

278 **Viruses and cells.** HSV-2 strains 186 and SD90e were kind gifts from David Knipe, Harvard  
279 University. The construction of HSV-2 186 strain UL16 knockout ( $\Delta$ 16) was described  
280 previously (6). HSV-2 strain HG52 was kindly provided by Aidan Dolan and Duncan McGeoch,  
281 University of Glasgow. HSV-1 strains F and KOS were generously provided by Lynn Enquist,  
282 Princeton University. African green monkey kidney cells (Vero) and human embryonic kidney  
283 293T cells were acquired from the ATCC. Phoenix-AMPHO cells were generously provided  
284 by Craig McCormick, Dalhousie University. The murine L fibroblast cell line was a kind gift  
285 from Frank Tufaro, University of British Columbia. All cell lines were cultured in Dulbecco's  
286 modified Eagle's medium (DMEM) supplemented with 10% fetal bovine serum (FBS), 1%  
287 penicillin-streptomycin, and 1% GlutaMAX and grown at 37°C in a 5% CO<sub>2</sub> environment.

288 UL16 expressing cell lines were isolated by retroviral transduction using an  
289 amphotropic Phoenix-Moloney murine leukemia virus system described previously (17). In  
290 brief, plasmids pBMN-IP-UL16 or pBMN-IP-UL16K (see below) were transfected into  
291 Phoenix-AMPHO cells to produce the retroviruses. HSV-2 UL16 expressing cell lines (Vero16  
292 and 293T16) and HSV-1 UL16 expressing cell lines (L16K and Vero16K) were isolated by  
293 transducing either Vero, 293T or L cells with the corresponding amphotropic retroviruses,  
294 and were selected using 2 µg/mL puromycin (InvivoGen) 48 hrs after transduction. To confirm  
295 UL16 expression, cell extracts were prepared and analyzed by Western blotting using HSV-2

296 or HSV-1 UL16 antiserum (Sup Fig. 1).

297

298 **Antibodies.** Chicken polyclonal antiserum against HSV-2 UL16 (6) was used for Western  
299 blotting at a dilution of 1: 200, mouse monoclonal antibody against HSV-2 ICP27 (Virusys)  
300 was used for Western blotting at a dilution of 1: 1,000. Rabbit polyclonal antiserum against  
301 HSV-1 UL16 was a kind gift from John Wills, The Pennsylvania State University College of  
302 Medicine (18), which was used for Western blotting at a dilution of 1: 3,000. Rat polyclonal  
303 antiserum against Us3 (19) was used for indirect immunofluorescence microscopy at a  
304 dilution of 1: 1,000 and mouse monoclonal antibody against  $\beta$ -actin (Sigma) was used for  
305 Western blotting at a dilution of 1: 2,000. Alexa Fluor 568-conjugated goat anti-rat  
306 immunoglobulin G monoclonal antibody (Invitrogen Molecular Probes) was used at a dilution  
307 of 1:500 for immunofluorescence microscopy. Horseradish peroxidase-conjugated goat anti-  
308 mouse IgG, horseradish peroxidase-conjugated goat anti-chicken IgY, horseradish  
309 peroxidase-conjugated rabbit anti-rat IgG and horseradish peroxidase-conjugated goat anti-  
310 rabbit IgG (Sigma) were used for Western blotting at dilutions of 1: 10,000, 1: 30,000, 1:  
311 80,000 and 1: 5,000, respectively.

312

313 **Plasmid construction.** pBMN-IP-UL16 encoding HSV-2 UL16 was constructed previously (6).  
314 To construct pBMN-IP-UL16K, UL16 KOS sequences were amplified from HSV-1 KOS  
315 genomic DNA by PCR using the forward primer 5'-GACTGAATTCATGG CGCAGCTGGGAC-  
316 3' containing an EcoRI restriction site (*italics*) and reverse primer 5'-  
317 GACTCTCGAGTTATTCGGGATCGCTTG-3' containing a XhoI restriction site (*italics*). The

318 PCR product was digested with EcoRI and XhoI and ligated into similarly digested pBMN-IP  
319 (a kind gift of Craig McCormick, Dalhousie University) to yield pBMN-IP-UL16K.

320 Guide RNAs (gRNAs) used for producing the *UL16* mutant strains were expressed  
321 from the guide RNA-Cas9 expression plasmid pX330-U6-Chimeric\_BB-CBh-hSpCas9, a gift  
322 from Feng Zhang (Addgene plasmid 42230) (20). To construct these gRNA expression  
323 plasmids the top-strand oligonucleotide was annealed to the bottom-strand oligonucleotide  
324 (Table 1) and the double-stranded product was cloned into pX330-U6-Chimeric\_BB-CBh-  
325 hSpCas9, that had been digested with BbsI. Three different *UL16* gRNAs were designed, for  
326 both HSV-1 and HSV-2, to produce different sized deletions within *UL16*.

327

328 **CRISPR/Cas9 mutagenesis of the *UL16* locus.** A similar approach to that used by Xu and  
329 colleagues for the construction of PRV mutants was utilized (21). Viral DNA of each strain  
330 (SD90e, HG52, KOS, or F) was purified as described previously (22). 293T16 cells growing in  
331 100-mm dishes were co-transfected with 16µg of purified viral genomic DNA along with 1µg  
332 each of two *UL16* guide RNA expression plasmids using a calcium phosphate co-precipitation  
333 method (23). 24h after transfection, the culture medium was replaced with semisolid medium  
334 containing 0.5% methyl cellulose to allow for plaque formation. Five to six days later, plaques  
335 were picked. Viral DNA isolated from a portion of the picked plaque was used for screening  
336 for *UL16* deletions by PCR. The *UL16* locus from viruses bearing *UL16* deletions were  
337 sequenced in their entirety to determine the precise nature of the *UL16* mutations introduced.  
338 Roughly 50% of plaques picked had *UL16* deletions or frame shift mutations.

339

340 **Plaque size determination.** Monolayers of Vero cells were prepared on 35-mm glass bottom  
341 dishes (MatTek), and infected with virus at a multiplicity of infection (MOI) of 0.005. Plaques  
342 were allowed to form for 24h prior to fixation and processing for indirect immunofluorescence  
343 microscopy (6) using antisera against the HSV Us3 protein (19). Images of plaques were  
344 captured on a Nikon TE200 inverted epifluorescence microscope using a 10X objective and a  
345 cooled CCD camera. To quantify these results, the numbers of pixels in the area of each  
346 plaque were counted using Image-Pro 6.3 software. Results shown were derived from 40  
347 distinct plaques per strain.

348

349 **Transmission electron microscopy (TEM).** Vero cells growing in 100-mm dishes were  
350 infected with virus at an MOI of 3 and processed for TEM at 16 hpi. Infected cells were rinsed  
351 with PBS three times before fixing in 1.5 mL of 2.5% glutaraldehyde in 0.1 M sodium  
352 cacodylate buffer (pH 7.4) for 60 mins. Cell were collected by scraping into fixative and  
353 centrifugation at 300×g for 5 min. Cell pellets were carefully enrobed in an equal volume of  
354 molten 5% low-melting point agarose and allowed to cool. Specimens embedded in agarose  
355 were incubated in 2.5% glutaraldehyde in 0.1 M sodium cacodylate buffer (pH 7.4) for 1.5 hrs  
356 and post-fixed in 1% osmium tetroxide for 1 hr. The fixed cells in agarose were rinsed with  
357 distilled water 3 times and stained in 0.5% uranyl acetate overnight before dehydration in  
358 ascending grades of ethanol (30%-100%). Samples were transitioned from ethanol to  
359 infiltration with propylene oxide and embedded in Embed-812 hard resin (Electron Microscopy  
360 Sciences). Blocks were sectioned at 50-60 nm and stained with uranyl acetate and Reynolds'  
361 lead citrate. Images were collected using a Hitachi H-7000 transmission electron microscope  
362 operating at 75kV.

## 363 Acknowledgements

364 This work was supported by the Canadian Institutes of Health Research operating  
365 grant 93804, Natural Sciences and Engineering Council of Canada Discovery Grant 418719  
366 and Canada Foundation for Innovation award 16389 to BWB. JG was supported in part by an  
367 award from the China Scholarship Council. We are grateful to Kelsey Wan for help with viral  
368 DNA preparation, Laura Ruhge and Greg Smith for advice with sample preparation for  
369 electron microscopy and Renée Finnen for critical reading of the manuscript.

370

## 371 References

- 372 1. **Bigalke JM, Heldwein EE.** 2017. Have NEC Coat, Will Travel: Structural Basis of  
373 Membrane Budding During Nuclear Egress in Herpesviruses. *Adv Virus Res* **97**:107-  
374 141.
- 375 2. **Hellberg T, Passvogel L, Schulz KS, Klupp BG, Mettenleiter TC.** 2016. Nuclear  
376 Egress of Herpesviruses: The Prototypic Vesicular Nucleocytoplasmic Transport. *Adv*  
377 *Virus Res* **94**:81-140.
- 378 3. **Hollinshead M, Johns HL, Sayers CL, Gonzalez-Lopez C, Smith GL, Elliott G.**  
379 2012. Endocytic tubules regulated by Rab GTPases 5 and 11 are used for  
380 envelopment of herpes simplex virus. *EMBO J* **31**:4204-4220.
- 381 4. **Johnson DC, Baines JD.** 2011. Herpesviruses remodel host membranes for virus  
382 egress. *Nat Rev Microbiol* **9**:382-394.
- 383 5. **Turcotte S, Letellier J, Lippé R.** 2005. Herpes Simplex Virus Type 1 Capsids Transit  
384 by the trans-Golgi Network, Where Viral Glycoproteins Accumulate Independently of  
385 Capsid Egress. *Journal of Virology* **79**:8847-8860.
- 386 6. **Gao J, Hay TJM, Banfield BW.** 2017. The Product of the Herpes Simplex Virus Type  
387 2 UL16 Gene is Critical for the Egress of Capsids from the Nuclei of Infected Cells.  
388 *Journal of Virology* doi:10.1128/jvi.00350-17.
- 389 7. **Baines JD, Roizman B.** 1991. The open reading frames UL3, UL4, UL10, and UL16  
390 are dispensable for the replication of herpes simplex virus 1 in cell culture. *Journal of*  
391 *Virology* **65**:938-944.
- 392 8. **Starkey JL, Han J, Chadha P, Marsh JA, Wills JW.** 2014. Elucidation of the Block to  
393 Herpes Simplex Virus Egress in the Absence of Tegument Protein UL16 Reveals a  
394 Novel Interaction with VP22. *Journal of Virology* **88**:110-119.
- 395 9. **Klupp BG, Böttcher S, Granzow H, Kopp M, Mettenleiter TC.** 2005. Complex  
396 Formation between the UL16 and UL21 Tegument Proteins of Pseudorabies Virus.  
397 *Journal of Virology* **79**:1510-1522.

- 398 10. **Dolan A, Jamieson FE, Cunningham C, Barnett BC, McGeoch DJ.** 1998. The  
399 Genome Sequence of Herpes Simplex Virus Type 2. *Journal of Virology* **72**:2010-  
400 2021.
- 401 11. **Colgrove R, Diaz F, Newman R, Saif S, Shea T, Young S, Henn M, Knipe DM.**  
402 2014. Genomic sequences of a low passage herpes simplex virus 2 clinical isolate and  
403 its plaque-purified derivative strain. *Virology* **450–451**:140-145.
- 404 12. **Lai W, Chen C, Morse S, Htun Y, Fehler H, Liu H, Ballard R.** 2003. Increasing  
405 relative prevalence of HSV-2 infection among men with genital ulcers from a mining  
406 community in South Africa. *Sexually Transmitted Infections* **79**:202-207.
- 407 13. **Roizman BaF, D.** 1974. The replication of herpesviruses, p 229-403. *In* Wagner HF-  
408 CaRR (ed), *Comprehensive Virology*, vol 3. Plenum Press, New York.
- 409 14. **Yeh P-C, Han J, Chadha P, Meckes DG, Ward MD, Semmes OJ, Wills JW.** 2011.  
410 Direct and Specific Binding of the UL16 Tegument Protein of Herpes Simplex Virus to  
411 the Cytoplasmic Tail of Glycoprotein E. *Journal of Virology* **85**:9425-9436.
- 412 15. **Han J, Chadha P, Starkey JL, Wills JW.** 2012. Function of glycoprotein E of herpes  
413 simplex virus requires coordinated assembly of three tegument proteins on its  
414 cytoplasmic tail. *Proceedings of the National Academy of Sciences* **109**:19798-19803.
- 415 16. **Oshima S, Daikoku T, Shibata S, Yamada H, Goshima F, Nishiyama Y.** 1998.  
416 Characterization of the UL16 gene product of herpes simplex virus type 2. *Archives of*  
417 *virology* **143**:863-880.
- 418 17. **Swift S, Lorens J, Achacoso P, Nolan GP.** 2001. Rapid Production of Retroviruses  
419 for Efficient Gene Delivery to Mammalian Cells Using 293T Cell-Based Systems,  
420 *Current Protocols in Immunology* doi:10.1002/0471142735.im1017cs31. John Wiley &  
421 Sons, Inc.
- 422 18. **Han J, Chadha P, Meckes DG, Baird NL, Wills JW.** 2011. Interaction and  
423 Interdependent Packaging of Tegument Protein UL11 and Glycoprotein E of Herpes  
424 Simplex Virus. *Journal of Virology* **85**:9437-9446.
- 425 19. **Finnen RL, Roy BB, Zhang H, Banfield BW.** 2010. Analysis of filamentous process  
426 induction and nuclear localization properties of the HSV-2 serine/threonine kinase Us3.  
427 *Virology* **397**:23-33.
- 428 20. **Cong L, Ran FA, Cox D, Lin S, Barretto R, Habib N, Hsu PD, Wu X, Jiang W,**  
429 **Marraffini LA, Zhang F.** 2013. Multiplex genome engineering using CRISPR/Cas  
430 systems. *Science* **339**:819-823.
- 431 21. **Xu A, Qin C, Lang Y, Wang M, Lin M, Li C, Zhang R, Tang J.** 2015. A simple and  
432 rapid approach to manipulate pseudorabies virus genome by CRISPR/Cas9 system.  
433 *Biotechnol Lett* **37**:1265-1272.
- 434 22. **Sawtell NM, Thompson RL.** 2014. Herpes Simplex Virus Mutant Generation and  
435 Dual-Detection Methods for Gaining Insight into Latent/Lytic Cycles In Vivo, p 129-147.  
436 *In* Diefenbach RJ, Fraefel C (ed), *Herpes Simplex Virus: Methods and Protocols*  
437 doi:10.1007/978-1-4939-0428-0\_9. Springer New York, New York, NY.
- 438 23. **Graham FL, van der Eb AJ.** 1973. A new technique for the assay of infectivity of  
439 human adenovirus 5 DNA. *Virology* **52**:456-467.

440

441



442 **Figure legends**

443 **Fig 1. HSV *UL16* mutants.** Diagrams of full-length (WT) and mutant *UL16* proteins from  
444 HSV-2 (**A**) and HSV-1 (**B**) are shown. Four *UL16* deletion mutants of each HSV species were  
445 selected for further analysis. Blue bars indicate *UL16* protein sequence, dashed lines  
446 represent deleted sequences and green bars indicate non-*UL16* amino acids that arise due to  
447 frame shift. In the nomenclature used, the first letter after *UL16* indicates the parental strain  
448 (S= SD90e; H= HG52; K= KOS, F= F);  $\Delta$  refers to an in-frame deletion and the numbers  
449 following  $\Delta$  indicate the position of the codons that were deleted from the *UL16* gene; FS  
450 refers to a frame shift and the first number following FS refers to the position of the codon  
451 where the frame shift occurred and the last number refers to the number of non-*UL16* amino  
452 acids. Western blots of cell lysates from Vero cells infected with the strains shown in **A** and **B**  
453 were probed using antiserum against HSV -2 *UL16* (**C**) or HSV-1 *UL16* (**D**). ICP27 antiserum  
454 was used as a positive control for viral infection, while  $\beta$ -actin was used as a loading control. Single  
455 asterisks indicate truncated forms of *UL16*. Double asterisk indicates position of a non-specific band  
456 detected in HG52 infected cell lysates in panel C.

457

458 **Fig 2. Cell-to-cell spread capabilities of HSV *UL16* mutants.** (**A**) Identical dilutions of each HSV  
459 strain were used to infect the non-complementing and complementing cell monolayers indicated. Cells  
460 were fixed and stained with 0.5% methylene blue in 70% methanol at 72 hpi. (**B**) Vero cells were  
461 infected with the indicated viruses, and cells were fixed and plaques stained using antiserum against  
462 HSV *Us3* by indirect immunofluorescence microscopy at 24 hpi. Plaque sizes were determined as  
463 described in Materials and Methods (n=40 plaques per strain). Error bars represent standard error of  
464 means. HSV wild type strains 186, SD90e, HG52, KOS and F were normalized to 100%. (\*\*\*,  
465  $P<0.0001$ ).



466

467 **Fig 3. Replication kinetics of HSV *UL16* deletion mutants.** Monolayers of Vero cells were infected  
468 with parental HSV strains (**A.** SD90e, **B.** HG52, **C.** KOS, and **D.** F) and their corresponding *UL16*  
469 deletion mutants at an MOI of 0.01. Cells and medium were harvested together at indicated times post  
470 infection, and titrated on monolayers of L16 cells. Each data point represents the average data from  
471 two biological replicates, each of which was titrated in triplicate. Error bars are standard errors of the  
472 means.

473

474 **Fig 4. Reciprocal complementation between HSV-2 and HSV-1 *UL16*.** Monolayers of Vero,  
475 Vero16 and Vero16K cells were infected with identical dilutions of each HSV-2 (**A**) and HSV-1 (**B**)  
476 strain. At 72 hpi cells were fixed and stained with 0.5% methylene blue in 70% methanol.

477

478 **Fig 5. Ultrastructural analysis of HSV-2 infected cells.** Vero cells were infected with HSV-2 SD90e  
479 (**A** and **B**) and the *UL16* deletion mutant, UL16S $\Delta$ 10-360 (**C** and **D**), at an MOI of 3. At 16 hpi, cells  
480 were fixed and processed for TEM as described in Materials and Methods. Non-enveloped  
481 cytoplasmic capsids and enveloped virions can be observed in the cytoplasm of SD90e infected Vero  
482 cells (**B**). These structures were rarely observed in the cytoplasm of UL16S $\Delta$ 10-360 infected cells (**D**).  
483 Nuclear capsids were readily detected in the nuclei of SD90e (**A**) and UL16S $\Delta$ 10-360 (**C**) infected  
484 cells. Insets in each panel show magnified portions of the images. White arrowhead in the panel A  
485 inset identifies an A capsid, whereas a B capsid is identified with a black arrow and a C capsid  
486 identified with a black arrowhead. Inset to panel B identifies an enveloped capsid with a black arrow  
487 and a non-enveloped capsid with a black arrowhead.

488

489 **Fig 6. Ultrastructural analysis of HSV-1 infected cells.** Vero cells were infected with HSV-1 F (**A**  
490 and **B**) and the *UL16* deletion mutant, UL16F $\Delta$ 139-359 (**C** and **D**), at an MOI of 3. At 16 hpi, cells were  
491 fixed and processed for TEM as described in Materials and Methods. Non-enveloped cytoplasmic  
492 capsids and enveloped virions can be observed in the cytoplasm of F infected cells (**B**). Enveloped  
493 virions were less frequently observed in the cytoplasm of UL16F $\Delta$ 139-359 infected cells where non-  
494 enveloped capsids were abundant (**D**). Nuclear capsids were readily detected in the nuclei of both F  
495 (**A**) and UL16F $\Delta$ 139-359 (**C**) infected cells.

496

497 **Fig 7. Analysis of capsid distribution in cells infected with HSV *UL16* deletion mutants. (A)**  
498 Ratio of intranuclear C-capsids:cytoplasmic capsids of parental HSV strains and their corresponding  
499 *UL16* deletion mutants and were determined. Values were calculated from 10 independent images per  
500 strain. Error bars represent standard error of the means. (**B**) Ratio of enveloped:cytoplasmic capsids  
501 of parental HSV strains and their corresponding *UL16* deletion mutants were calculated using the  
502 same methodology as in (**A**). \*\*\*  $P < 0.0001$ , \*\*  $P < 0.001$ , \*  $P < 0.05$ .

503

504 **Fig 8. Ultrastructural analysis of trans-complemented *UL16* mutants.** Vero16 cells, expressing  
505 HSV-2 *UL16*, and Vero16K cells, expressing HSV-1 *UL16*, were infected with UL16S $\Delta$ 10-360 (**A** and  
506 **B**) and UL16K $\Delta$ 28-359 (**C** and **D**), at an MOI of 3. At 16 hpi, cells were fixed and processed for TEM  
507 as described in Materials and Methods. Numerous nuclear and cytoplasmic capsids can be observed  
508 in all infected cells.

509

510 **Fig 9. Quantitative analysis of *UL16* trans-complementation. (A)** Ratio of intranuclear C-  
511 capsids:cytoplasmic capsids of representative HSV-2 and HSV-1 *UL16* mutants complemented either

512 by HSV-2 (Vero16) or HSV-1 (Vero16K) UL16 protein. Values were calculated from 10 independent  
513 images per strain. Error bars represent standard error of the means. **(B)** Ratio of  
514 enveloped:cytoplasmic capsids of representative HSV-2 and HSV-1 *UL16* mutants complemented  
515 either by HSV-2 or HSV-1 UL16 protein were calculated using the same methodology as in **(A)**. \*\*\*  
516  $P < 0.0001$ , \*\*  $P < 0.001$ , \*  $P < 0.05$ .

517

518

519

520

521

522

523

524

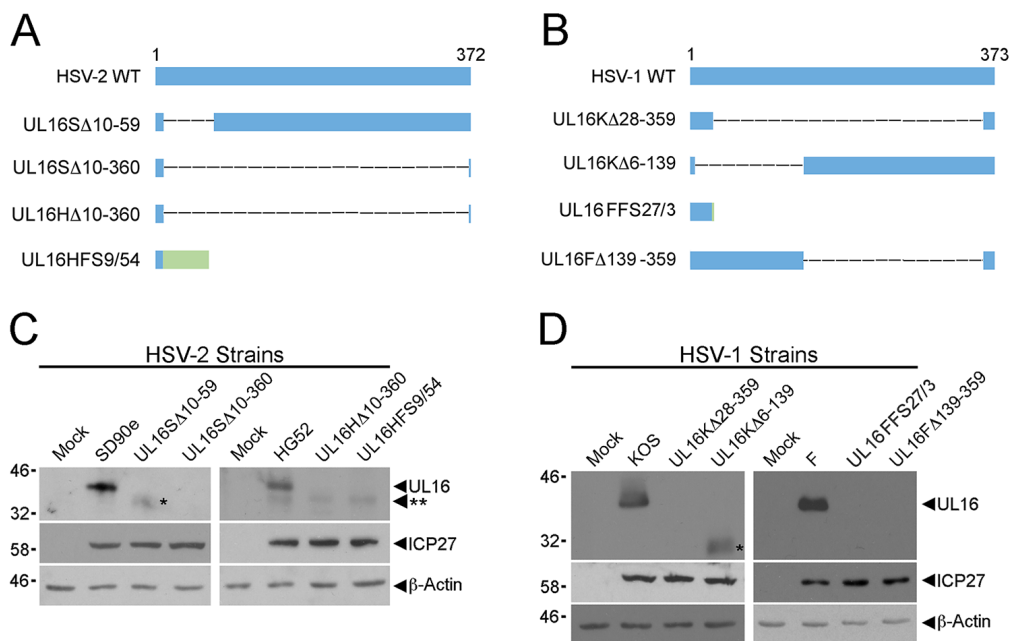

525

526 **Fig 1. HSV *UL16* mutants.** Diagrams of full-length (WT) and mutant *UL16* proteins from  
 527 HSV-2 (**A**) and HSV-1 (**B**) are shown. Four *UL16* deletion mutants of each HSV species were  
 528 selected for further analysis. Blue bars indicate *UL16* protein sequence, dashed lines  
 529 represent deleted sequences and green bars indicate non-*UL16* amino acids that arise due to  
 530 frame shift. In the nomenclature used, the first letter after *UL16* indicates the parental strain  
 531 (S= SD90e; H= HG52; K= KOS, F= F);  $\Delta$  refers to an in-frame deletion and the numbers  
 532 following  $\Delta$  indicate the position of the codons that were deleted from the *UL16* gene; FS  
 533 refers to a frame shift and the first number following FS refers to the position of the codon  
 534 where the frame shift occurred and the last number refers to the number of non-*UL16* amino  
 535 acids. Western blots of cell lysates from Vero cells infected with the strains shown in **A** and **B**  
 536 were probed using antiserum against HSV -2 *UL16* (**C**) or HSV-1 *UL16* (**D**). ICP27 antiserum  
 537 was used as a positive control for viral infection, while  $\beta$ -actin was used as a loading control. Single  
 538 asterisks indicate truncated forms of *UL16*. Double asterisk indicates position of a non-specific band  
 539 detected in HG52 infected cell lysates in panel C.

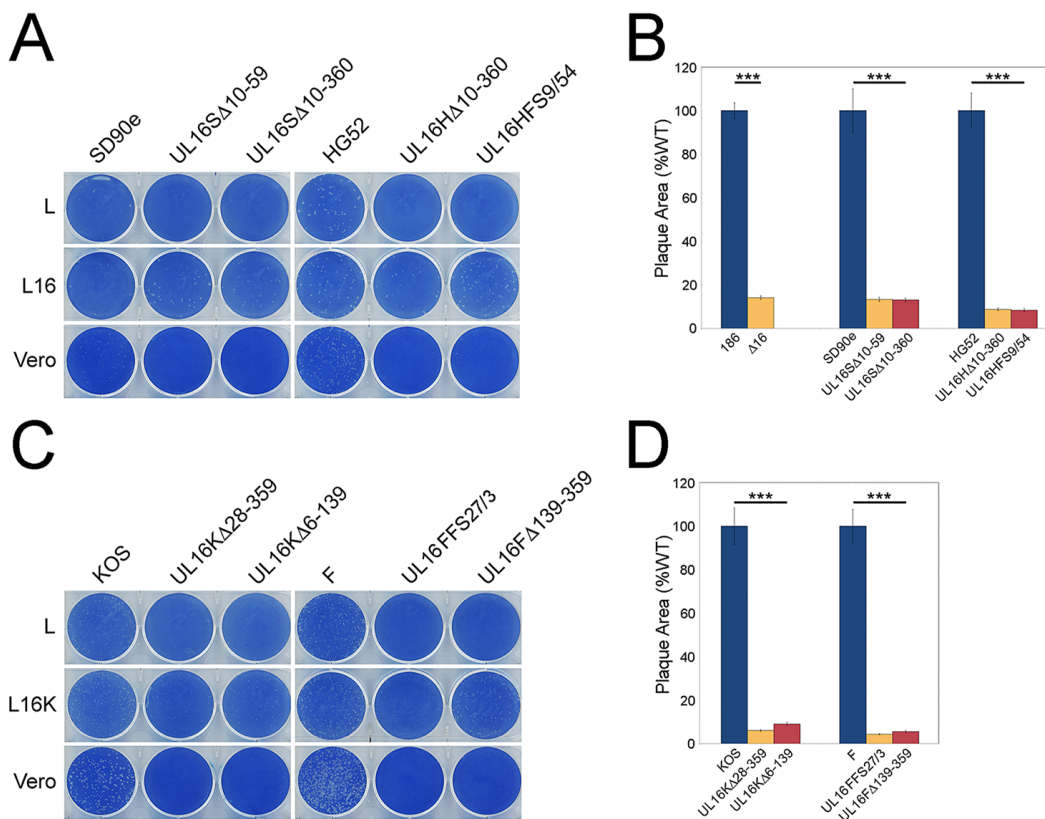

540

541

**Fig 2. Cell-to-cell spread capabilities of HSV UL16 mutants. (A)** Identical dilutions of each HSV

542

strain were used to infect the non-complementing and complementing cell monolayers indicated. Cells

543

were fixed and stained with 0.5% methylene blue in 70% methanol at 72 hpi. **(B)** Vero cells were

544

infected with the indicated viruses, and cells were fixed and plaques stained using antiserum against

545

HSV Us3 by indirect immunofluorescence microscopy at 24 hpi. Plaque sizes were determined as

546

described in Materials and Methods (n=40 plaques per strain). Error bars represent standard error of

547

means. HSV wild type strains 186, SD90e, HG52, KOS and F were normalized to 100%. (\*\*\*,

548

$P < 0.0001$ ).

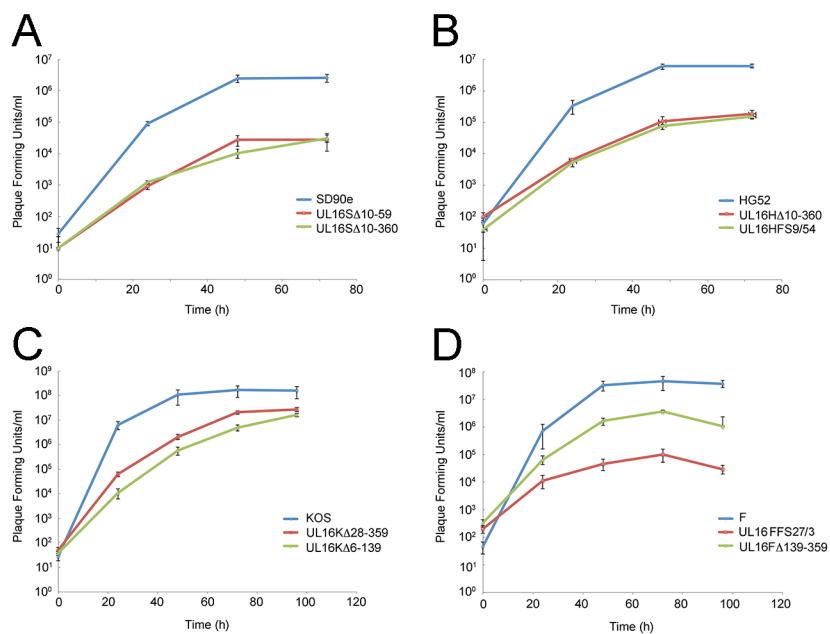

549

550 **Fig 3. Replication kinetics of HSV *UL16* deletion mutants.** Monolayers of Vero cells were infected  
551 with parental HSV strains (**A.** SD90e, **B.** HG52, **C.** KOS, and **D.** F) and their corresponding *UL16*  
552 deletion mutants at an MOI of 0.01. Cells and medium were harvested together at indicated times post  
553 infection, and titrated on monolayers of L16 cells. Each data point represents the average data from  
554 two biological replicates, each of which was titrated in triplicate. Error bars are standard errors of the  
555 means.

556

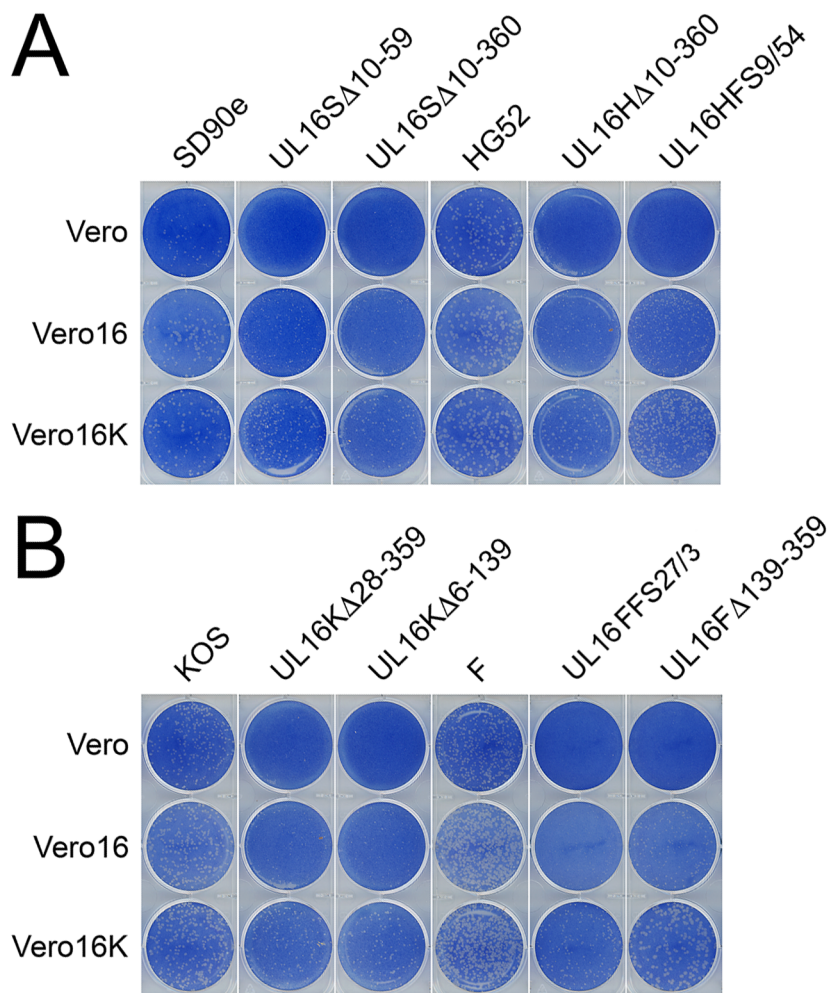

557

558 **Fig 4. Reciprocal complementation between HSV- 2 and HSV-1 UL16.** Monolayers of Vero,  
559 Vero16 and Vero16K cells were infected with identical dilutions of each HSV-2 (**A**) and HSV-1 (**B**)  
560 strain. At 72 hpi cells were fixed and stained with 0.5% methylene blue in 70% methanol.

561



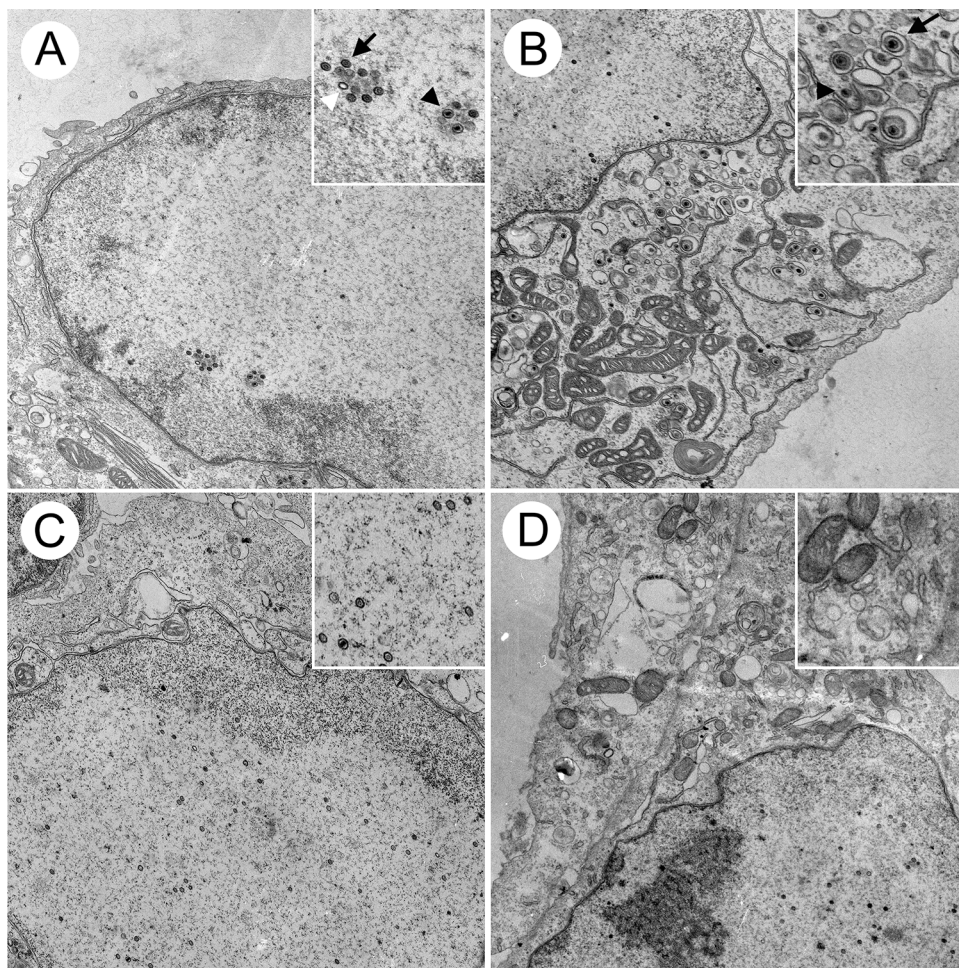

562

563 **Fig 5. Ultrastructural analysis of HSV-2 infected cells.** Vero cells were infected with HSV-2 SD90e  
564 (**A and B**) and the *UL16* deletion mutant, *UL16S $\Delta$ 10-360* (**C and D**), at an MOI of 3. At 16 hpi, cells  
565 were fixed and processed for TEM as described in Materials and Methods. Non-enveloped  
566 cytoplasmic capsids and enveloped virions can be observed in the cytoplasm of SD90e infected Vero  
567 cells (**B**). These structures were rarely observed in the cytoplasm of *UL16S $\Delta$ 10-360* infected cells (**D**).  
568 Nuclear capsids were readily detected in the nuclei of SD90e (**A**) and *UL16S $\Delta$ 10-360* (**C**) infected  
569 cells. Insets in each panel show magnified portions of the images. White arrowhead in the panel A  
570 inset identifies an A capsid, whereas a B capsid is identified with a black arrow and a C capsid  
571 identified with a black arrowhead. Inset to panel B identifies an enveloped capsid with a black arrow  
572 and a non-enveloped capsid with a black arrowhead.



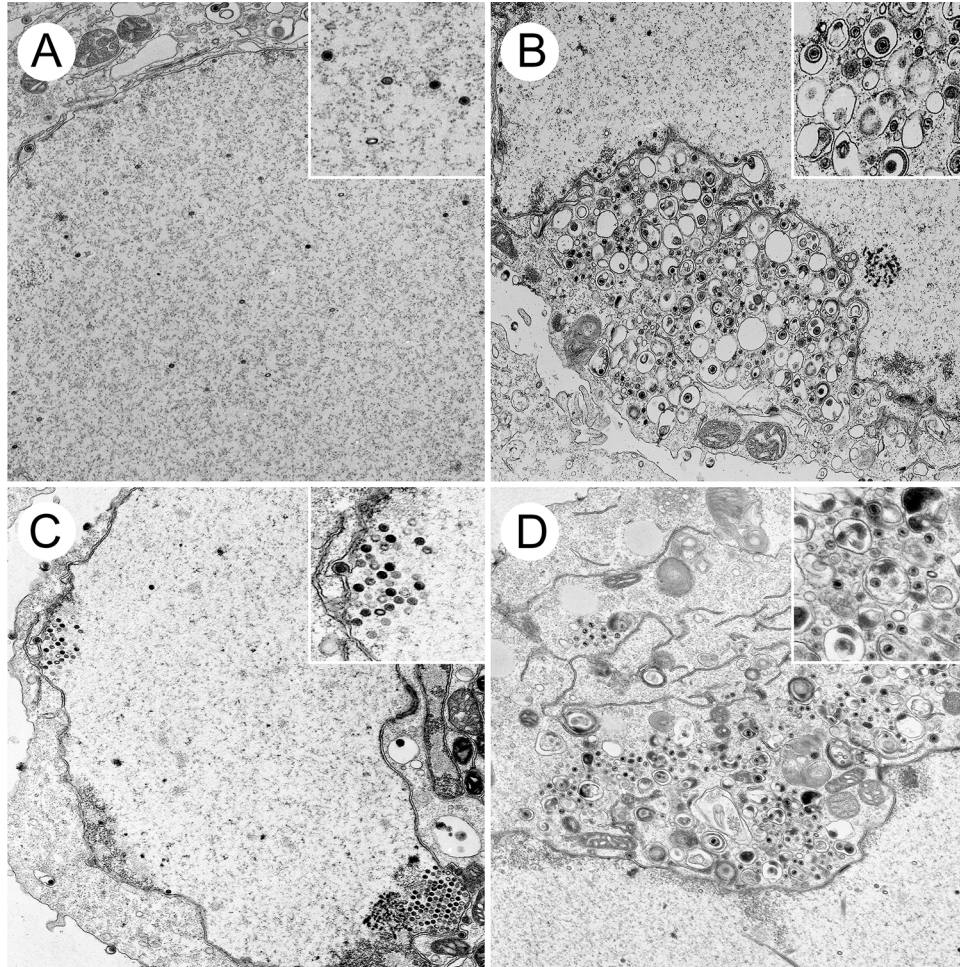

573

574 **Fig 6. Ultrastructural analysis of HSV-1 infected cells.** Vero cells were infected with HSV-1 F (**A**  
575 and **B**) and the *UL16* deletion mutant, *UL16F* $\Delta$ 139-359 (**C** and **D**), at an MOI of 3. At 16 hpi, cells were  
576 fixed and processed for TEM as described in Materials and Methods. Non-enveloped cytoplasmic  
577 capsids and enveloped virions can be observed in the cytoplasm of F infected cells (**B**). Enveloped  
578 virions were less frequently observed in the cytoplasm of *UL16F* $\Delta$ 139-359 infected cells where non-  
579 enveloped capsids were abundant (**D**). Nuclear capsids were readily detected in the nuclei of both F  
580 (**A**) and *UL16F* $\Delta$ 139-359 (**C**) infected cells.

581

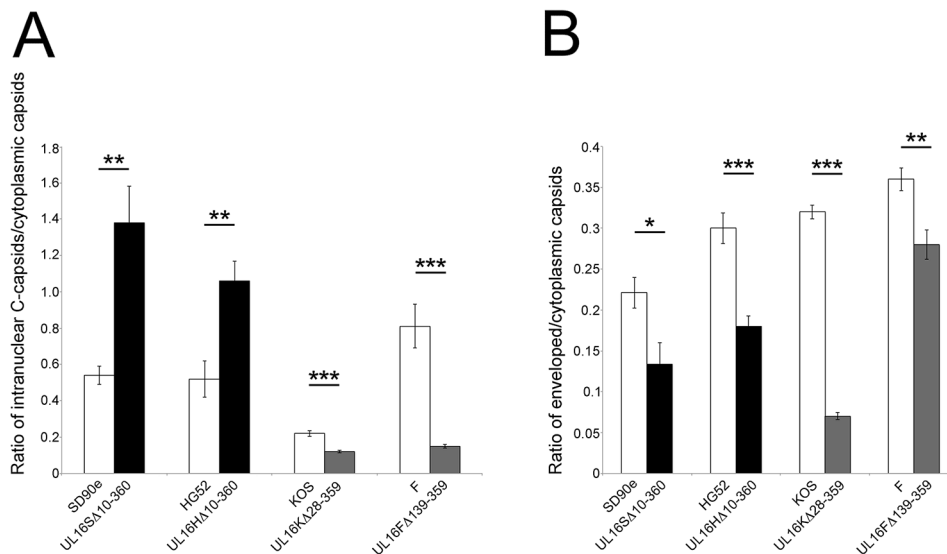

582

583 **Fig 7. Analysis of capsid distribution in cells infected with HSV *UL16* deletion mutants. (A)**

584 Ratio of intranuclear C-capsids:cytoplasmic capsids of parental HSV strains and their corresponding

585 *UL16* deletion mutants and were determined. Values were calculated from 10 independent images per

586 strain. Error bars represent standard error of the means. (B) Ratio of enveloped:cytoplasmic capsids

587 of parental HSV strains and their corresponding *UL16* deletion mutants were calculated using the

588 same methodology as in (A). \*\*\*  $P < 0.0001$ , \*\*  $P < 0.001$ , \*  $P < 0.05$ .

589



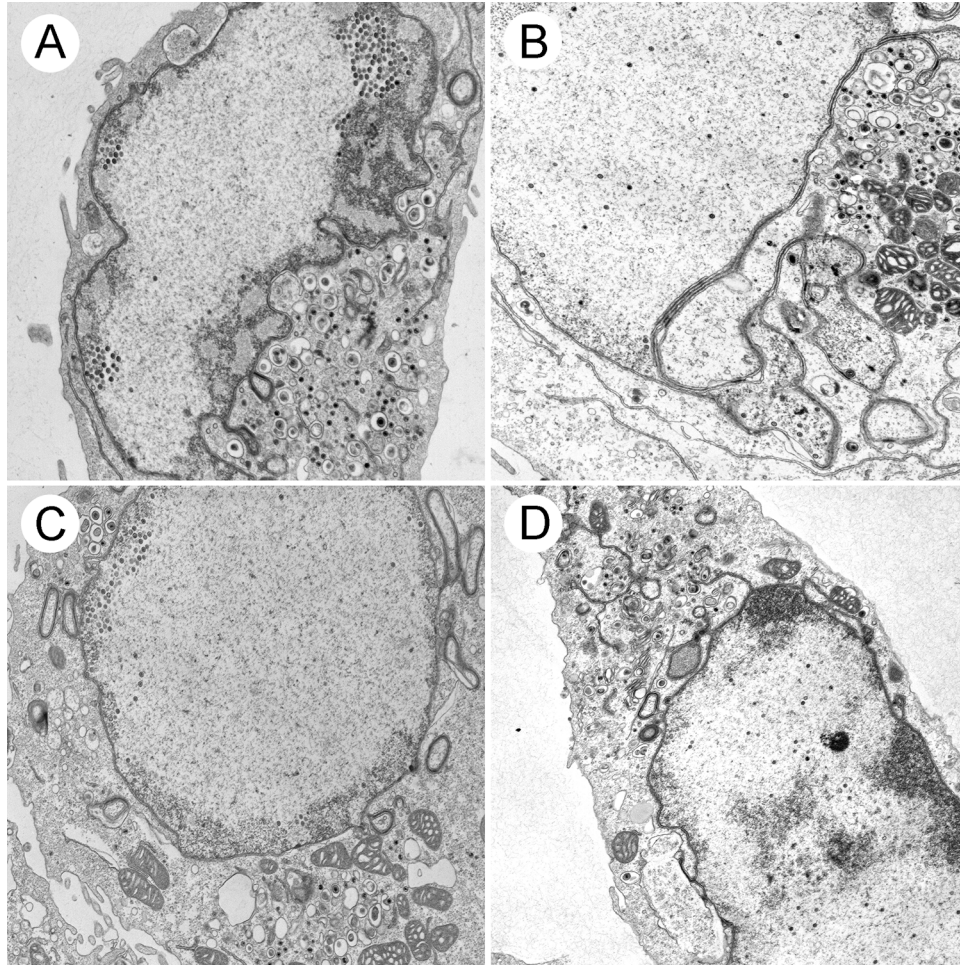

590

591 **Fig 8. Ultrastructural analysis of trans-complemented *UL16* mutants.** Vero16 cells, expressing  
592 HSV-2 UL16, and Vero16K cells, expressing HSV-1 UL16, were infected with UL16S $\Delta$ 10-360 (**A** and  
593 **B**) and UL16K $\Delta$ 28-359 (**C** and **D**), at an MOI of 3. At 16 hpi, cells were fixed and processed for TEM  
594 as described in Materials and Methods. Numerous nuclear and cytoplasmic capsids can be observed  
595 in all infected cells.

596

597

598

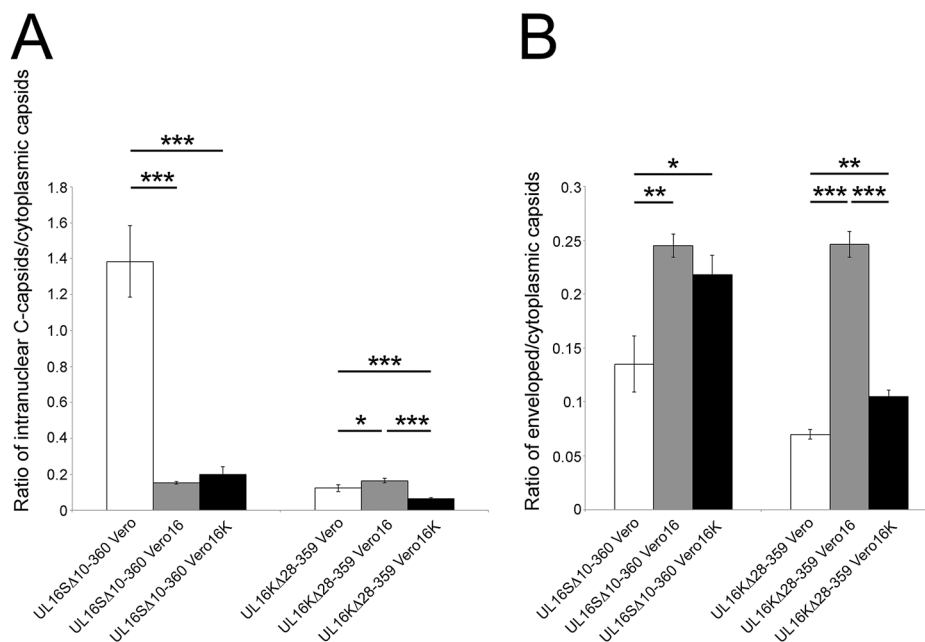

599

600 **Fig 9. Quantitative analysis of UL16 trans-complementation. (A)** Ratio of intranuclear C-  
 601 capsids:cytoplasmic capsids of representative HSV-2 and HSV-1 *UL16* mutants complemented either  
 602 by HSV-2 (Vero16) or HSV-1 (Vero16K) *UL16* protein. Values were calculated from 10 independent  
 603 images per strain. Error bars represent standard error of the means. **(B)** Ratio of  
 604 enveloped:cytoplasmic capsids of representative HSV-2 and HSV-1 *UL16* mutants complemented  
 605 either by HSV-2 or HSV-1 *UL16* protein were calculated using the same methodology as in **(A)**. \*\*\*  
 606  $P < 0.0001$ , \*\*  $P < 0.001$ , \*  $P < 0.05$ .

607

608

Table 1. Oligonucleotides used to produce HSV-2 and HSV-1 *UL16* gRNAs

| gRNAs                   | Predicted nucleotide cleavage site <sup>a</sup> | Top strand (5'-3')              | Bottom strand (5'-3')           |
|-------------------------|-------------------------------------------------|---------------------------------|---------------------------------|
| HSV-2 <i>UL16</i> gRNAs | nt28                                            | 5'-CACCGCGGGCACTCTGGCGTCCCC-3'  | 5'-AAACGGGGACGCCAGAGTGCCCGC-3'  |
|                         | nt177                                           | 5'-CACCGCGTCGTTCTGGGGGGACGAG-3' | 5'-CACCGCGTCGTTCTGGGGGGACGAG-3' |
|                         | nt1078                                          | 5'-CACCGAGCTGCCCGCGGTCGCGC-3'   | 5'-AAACGCGCGACCGCGGGGCAGCTC-3'  |
| HSV-1 <i>UL16</i> gRNAs | nt99                                            | 5'-AAACCCGTTGCCCGGGCCGTTGCC-3'  | 5'-CACCGGCAACGGCCCGGGCAACGG-3'  |
|                         | nt430                                           | 5'-AAACGACCCCGCTCCTGTGCACCC-3'  | 5'-CACCGGTGCACAGGAGCGGGGTC-3'   |
|                         | nt1095                                          | 5'-CACCGGTGCACAGGAGCGGGGTC-3'   | 5'-CACCGGCAACGGCCCGGGCAACGG-3'  |

<sup>a</sup> Nucleotide position in the *UL16* gene targeted by the gRNA

Table 2. Quantification of intracellular capsids in Vero cells infected with *UL16* mutant and parental HSV strains<sup>a</sup>

| Strain        | Total Number of Capsids | Intranuclear Capsids    |          | Cytoplasmic Capsids |           | PNS <sup>b</sup> Capsids |
|---------------|-------------------------|-------------------------|----------|---------------------|-----------|--------------------------|
|               |                         | A+B                     | C        | Non-Enveloped       | Enveloped |                          |
| SD90e         | 948                     | 377(39.8 <sup>c</sup> ) | 96(10.1) | 250(26.4)           | 53(5.6)   | 172(18.1)                |
| UL16SΔ10-360  | 992                     | 677(68.2)               | 75(7.6)  | 159(16)             | 13(1.3)   | 68(6.9)                  |
| HG52          | 1429                    | 676(47.3)               | 107(7.5) | 441(30.9)           | 163(11.4) | 42(2.9)                  |
| UL16HΔ10-360  | 990                     | 702(70.9)               | 91(9.2)  | 156(15.7)           | 29(2.9)   | 12(1.2)                  |
| KOS           | 850                     | 249(29.3)               | 75(8.8)  | 296(34.8)           | 171(20.1) | 59(6.9)                  |
| UL16KΔ28-359  | 1058                    | 506(47.8)               | 58(5.5)  | 452(42.8)           | 35(3.3)   | 7(0.7)                   |
| F             | 663                     | 217(32.7)               | 77(11.6) | 175(26.4)           | 126(19)   | 68(10.3)                 |
| UL16FΔ139-359 | 1778                    | 892(50.2)               | 84(4.7)  | 671(37.7)           | 99(5.6)   | 32(1.8)                  |

<sup>a</sup> Capsids were counted in different cellular compartments from 10 images/strain derived from multiple sections in two independent experiments.

<sup>b</sup> Perinuclear space (PNS).

<sup>c</sup> Numbers in parentheses represent the percentage of capsids in each category.
